# Supplementary material for: Genetic Background and Clinicopathologic Features of Adult-onset Nephronophthisis
Source: PubMed Central journal article supplement — Kidney Int Rep. 2021 Mar 4;6(5):1346–54. doi: 10.1016/j.ekir.2021.02.005 (PMC8116764; doi:10.1016/j.ekir.2021.02.005), 2021-03-04

## Supplementary Methods

### Capture-based sequencing

RNA capture probes for the coding regions of the 69 genes were designed using Agilent's SureDesign service (<https://earray.chem.agilent.com/suredesign/home.htm>). Pooled and barcoded libraries for NGS were prepared using SureSelect QXT kits (Agilent Technologies, Santa Clara, California), according to the manufacturer's protocol. Prepared libraries were sequenced by 150-bp SE reads using Illumina MiSeq sequencers. Filtering of candidate variants was achieved, as described previously <sup>1</sup>. We first excluded single nucleotide variants (SNVs) with allele frequencies of >0.01 in any population within the Exome Aggregation Consortium <sup>2</sup> (ExAC: <http://exac.broadinstitute.org>); National Heart, Lung, and Blood Institute Exome Sequencing Project exome variant server dataset ESP6500 (<http://evs.gs.washington.edu/EVS/>); 1000 Genomes catalog <sup>3</sup> (<http://browser.1000genomes.org/index.html>); Human Genetic Variation Database <sup>4</sup> (HGVD: <http://www.genome.med.kyoto-u.ac.jp/SnpDB/>); or the genome cohort study of Tohoku Medical Megabank Organization <sup>5</sup> (ToMMo: <https://ijgvd.megabank.tohoku.ac.jp>). We excluded SNVs with “LOW” impact severities, based on the definition in the GEMINI software <sup>6</sup>; these included the following functional predictions: “synonymous\_coding,”

“intergenic,” “upstream,” “UTR,” “intron,” etc. To interpret the significance of the variants, we used the Polyphen2 <sup>7</sup>, SIFT <sup>8</sup>, CADD <sup>9</sup>, MCAP <sup>10</sup>, and GERP conservation scores <sup>11</sup>. The literature that was available in the Human Gene Mutation Database Pro <sup>12</sup> was reviewed to assess current evidence on the pathogenicity of previously reported variants. The detailed methods were described in our previous reports <sup>13,14</sup>.

### **Supplementary Methods References**

1. Chong JX, Burrage LC, Beck AE *et al.* Autosomal-Dominant Multiple Pterygium Syndrome Is Caused by Mutations in MYH3. *Am J Hum Genet* 2015; **96**: 841–849.
2. Lek M, Karczewski KJ, Minikel E V. *et al.* Analysis of protein-coding genetic variation in 60,706 humans. *Nature* 2016; **536**: 285–291.
3. 1000 Genomes Project Consortium, Auton A, Brooks LD *et al.* A global reference for human genetic variation. *Nature* 2015; **526**: 68–74.
4. Higasa K, Miyake N, Yoshimura J *et al.* Human genetic variation database, a reference database of genetic variations in the Japanese population. *J Hum Genet* 2016; **61**: 547–53.

5. Nagasaki M, Yasuda J, Katsuoka F *et al.* Rare variant discovery by deep whole-genome sequencing of 1,070 Japanese individuals. *Nat Commun* 2015; **6**: 8018.
6. Paila U, Chapman BA, Kirchner R *et al.* GEMINI: Integrative Exploration of Genetic Variation and Genome Annotations. *PLoS Comput Biol* 2013; **9**: e1003153.
7. Adzhubei IA, Schmidt S, Peshkin L *et al.* A method and server for predicting damaging missense mutations. *Nat Methods* 2010; **7**: 248–249.
8. Kumar P, Henikoff S, Ng PC. Predicting the effects of coding non-synonymous variants on protein function using the SIFT algorithm. *Nat Protoc* 2009; **4**: 1073–1082.
9. Kircher M, Witten DM, Jain P *et al.* A general framework for estimating the relative pathogenicity of human genetic variants. *Nat Genet* 2014; **46**: 310–315.
10. Jagadeesh KA, Wenger AM, Berger MJ *et al.* M-CAP eliminates a majority of variants of uncertain significance in clinical exomes at high sensitivity. *Nat Genet* 2016; **48**: 1581–1586.
11. Davydov E V., Goode DL, Sirota M *et al.* Identifying a high fraction of the human genome to be under selective constraint using GERP++. *PLoS Comput Biol* 2010; **6**: e1001025.

12. Stenson PD, Mort M, Ball E V. *et al.* The Human Gene Mutation Database: towards a comprehensive repository of inherited mutation data for medical research, genetic diagnosis and next-generation sequencing studies. *Hum Genet* 2017; **136**: 665–677.
13. Mori T, Hosomichi K, Chiga M *et al.* Comprehensive genetic testing approach for major inherited kidney diseases, using next-generation sequencing with a custom panel. *Clin Exp Nephrol* 2017; **21**: 63–75.
14. Fujimaru T, Mori T, Sekine A *et al.* Kidney enlargement and multiple liver cyst formation implicate mutations in PKD1/2 in adult sporadic polycystic kidney disease. *Clin Genet* 2018; **94**: 125–131.

**Supplementary Table S1. Disease categories and the targeted genes included in this**

**panel**

| <b>Disease family</b> | <b>Targeted Gene</b>                                                                                                                                                                                                |
|-----------------------|---------------------------------------------------------------------------------------------------------------------------------------------------------------------------------------------------------------------|
| ADPKD                 | <i>PKD1, PKD2</i>                                                                                                                                                                                                   |
| ARPKD                 | <i>PKHD1</i>                                                                                                                                                                                                        |
| NPHP                  | <i>NPHP1, INVS, NPHP3, NPHP4, IQCB1, CEP290, GLIS2, RPGRIP1L, NEK8, SDCCAG8, TMEM67, TTC21B, WDR19, ZNF423, CEP164, ANKS6, IFT172, CEP83, DCDC2, XPNPEP3, SLC41A1</i>                                               |
| JBS                   | <i>NPHP1, CEP290, RPGRIP1L, TMEM67, TTC21B, ZNF423, CEP164, IFT172, INPP5E, TMEM216, AH11, ARL13B, CC2D2A, OFD1, KIF7, TCTN1, TMEM237, CEP41, TMEM138, C5orf42, TCTN3, TMEM231, CSPP1, PDE6D, MKS1, TCTN2, B9D1</i> |
| MKS                   | <i>NPHP3, CEP290, RPGRIP1L, TMEM67, TMEM216, CC2D2A, TMEM231, MKS1, TCTN2, B9D1, B9D2</i>                                                                                                                           |
| SLS                   | <i>NPHP1, INVS, NPHP3, NPHP4, IQCB1, CEP290, GLIS2, SDCCAG8, WDR19, CEP164</i>                                                                                                                                      |
| BBS                   | <i>CEP290, SDCCAG8, TMEM67, TTC21B, WDR19, IFT172, MKS1, BBS1, BBS2, ARL6, BBS4, BBS5, MKKS, BBS7, TTC8, BBS9, BBS10, TRIM32, BBS12, WDPCP, BBIP1, IFT27, CCDC28B</i>                                               |
| Skeletal ciliopathies | <i>TTC21B, WDR19, IFT172, WDR35, IFT122, IFT140, IFT43</i>                                                                                                                                                          |
| ADTKD                 | <i>MUC1, UMOD, HNF1B</i>                                                                                                                                                                                            |
| Others                | <i>ASS1, NOTCH2</i>                                                                                                                                                                                                 |

ADPKD, autosomal dominant polycystic kidney disease; ARPKD, autosomal recessive

polycystic kidney disease; NPHP, nephronophthisis; JBS, Joubert syndrome; MKS,

Meckel syndrome; SLS, Senior–Løken syndrome; BBS, Bardet–Biedl syndrome; IFT,

intraflagellar transport; ADTKD, autosomal dominant tubulointerstitial kidney disease

**Supplementary Table S2. Primer sequences of *NPHPI***

| <b>Amplified Region <sup>a</sup></b> | <b>Primer</b> | <b>Sequence</b>          | <b>Product size (bp)</b> | <b>Annealing Temperature (°C)</b> |
|--------------------------------------|---------------|--------------------------|--------------------------|-----------------------------------|
| Exon 1                               | Forward       | GCCGGTTGGTTTCCCTG        | 209                      | 60                                |
|                                      | Reverse       | TAGGTGGGGTCACGGTGG       |                          |                                   |
| Exon 10                              | Forward       | GGCATTGGAAGTGCCTG        | 258                      | 60                                |
|                                      | Reverse       | TTGCAACTATGACAAAATCTGG   |                          |                                   |
| Exon 20                              | Forward       | TCCTACCTCTTAGGTGGCTTTTAG | 509                      | 60                                |
|                                      | Reverse       | AATCGTGGAGGATCCATCTG     |                          |                                   |

<sup>a</sup> The following NCBI reference sequences were used: *NPHPI*, NM\_000272.3

**Supplementary Table S3. Detected copy number variants in *NPHP1***

| <b>Patient</b> | <b>Chromosome</b> | <b>Start <sup>a</sup></b> | <b>End <sup>a</sup></b> | <b>Gene</b>  | <b>Gain/Loss</b> |
|----------------|-------------------|---------------------------|-------------------------|--------------|------------------|
| 883            | 2                 | g.110879716               | g.110962709             | <i>NPHP1</i> | loss             |
| 896            | 2                 | g.110962410               | g.110879895             | <i>NPHP1</i> | loss             |
| 1207           | 2                 | g.110879716               | g.110962709             | <i>NPHP1</i> | loss             |

<sup>a</sup> Based on the GRCh37 assembly

**Supplementary Table S4. Mutations in the genes related with nephronophthisis**

| Patient          | Mutation   | Gene <sup>a</sup> | cDNA change | Protein change | Mutation type | CADD | Polyphen | SIFT | ExAC     | ToMMo  | Previous reports |
|------------------|------------|-------------------|-------------|----------------|---------------|------|----------|------|----------|--------|------------------|
| 720              | Frameshift | <i>NPHP3</i>      | c.2425dupA  | p.M809fs       | Heterozygous  | None | None     | None | None     | None   | None             |
|                  | Missense   | <i>NPHP3</i>      | c.2171G>A   | p.R724H        | Heterozygous  | 4.99 | 0.001    | 0.6  | None     | None   | None             |
| 478 <sup>b</sup> | Missense   | <i>NPHP4</i>      | c.2198G>A   | p.G733D        | Heterozygous  | 20.1 | 1        | 0    | 9.10E-05 | 0.0037 | None             |
|                  | Missense   | <i>NPHP4</i>      | c.2717G>A   | p.R906H        | Heterozygous  | 5.89 | 0.003    | 0.21 | 0.0002   | 0.0061 | None             |
| 1107             | Nonsense   | <i>NPHP1</i>      | c.1639C>T   | p.Q547*        | Homozygous    | 38.0 | None     | None | None     | None   | None             |
| 930 <sup>b</sup> | Missense   | <i>CEP164</i>     | c.3737G>A   | p.R1246Q       | Heterozygous  | 3.32 | 0.001    | 0.65 | 8.24E-06 | 0.0005 | None             |
|                  | Missense   | <i>CEP164</i>     | c.452G>A    | p.R151Q        | Heterozygous  | 24.6 | 0.999    | 0.0  | 4.12E-05 | 0.0049 | None             |

CADD, combined annotation-dependent depletion; SIFT, sorting intolerant from tolerant; ExAC, exome aggregation consortium; ToMMo, Tohoku

Medical Megabank Organization

<sup>a</sup> The following NCBI reference sequences were used: *NPHP3*, NM\_153240.4; *NPHP4*, NM\_015102.4; *NPHP1*, NM\_000272.3; *CEP164*, NM\_014956.4

<sup>b</sup> Patient numbers 478 and 930 were confirmed compound heterozygous mutations by trio analysis



**Supplementary Table S5. Clinical characteristics of the pathologic control group**

| <b>Age<sup>a</sup></b> | <b>Sex</b> | <b>eGFR<sup>a</sup>, mL/min/1.73 m<sup>2</sup></b> | <b>Pathologic diagnosis</b>  | <b>Percentage of tubulointerstitial fibrosis</b> |
|------------------------|------------|----------------------------------------------------|------------------------------|--------------------------------------------------|
| 42                     | M          | 30.1                                               | IgA nephropathy              | 30–40%                                           |
| 49                     | M          | 26.0                                               | IgA nephropathy              | 30–40%                                           |
| 54                     | M          | 33.3                                               | Diabetic nephropathy         | N.D.                                             |
| 63                     | M          | 19.5                                               | Tubulointerstitial nephritis | 30%                                              |
| 63                     | F          | 30.0                                               | Tubulointerstitial nephritis | 10%                                              |
| 68                     | M          | 15.7                                               | Diabetic nephropathy         | 80–90%                                           |
| 70                     | F          | 33.8                                               | IgA nephropathy              | 30%                                              |
| 74                     | M          | 86.0                                               | Diabetic nephropathy         | 20%                                              |
| 80                     | M          | 20.0                                               | IgA nephropathy              | 30%                                              |

M, male; F, female; N.D., no data

<sup>a</sup> At the time of renal biopsy

## **Supplementary Figure 1. Representative pathologic findings**

a. Tubular diverticulum (patient number 914, PAM stain, 20× magnification). b. Tubular floret, which is defined as branching in at least four directions (patient number 742, PAM stain, 20× magnification). c. Cyst, which is defined as >200 μm in diameter (patient number 742, PAM stain, 10× magnification). All slides were scanned on a NanoZoomer NDP system with 40× resolution (0.23 μm/pixel) (Hama-matsu Photonics, Hamamatsu-City, Japan).

PAM, periodic acid methenamine silver

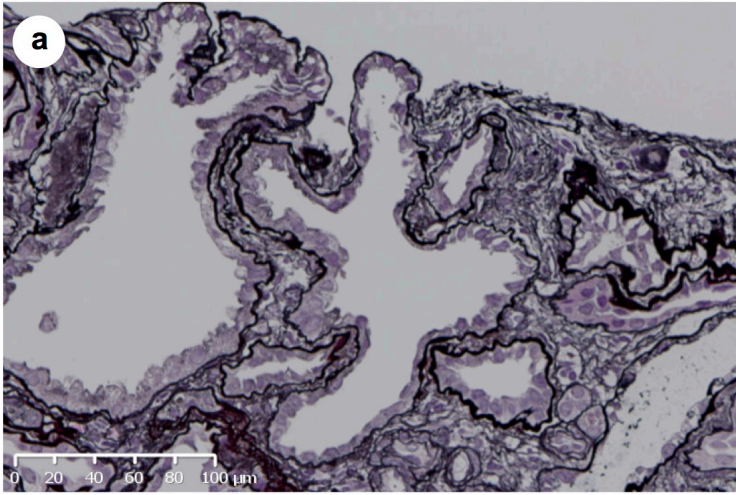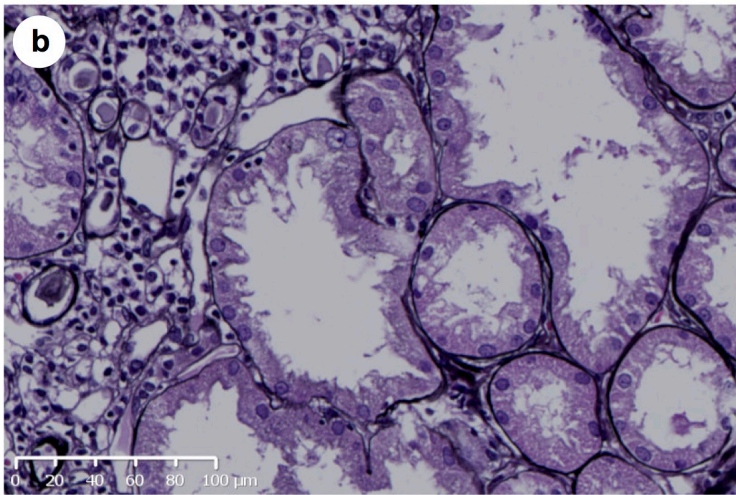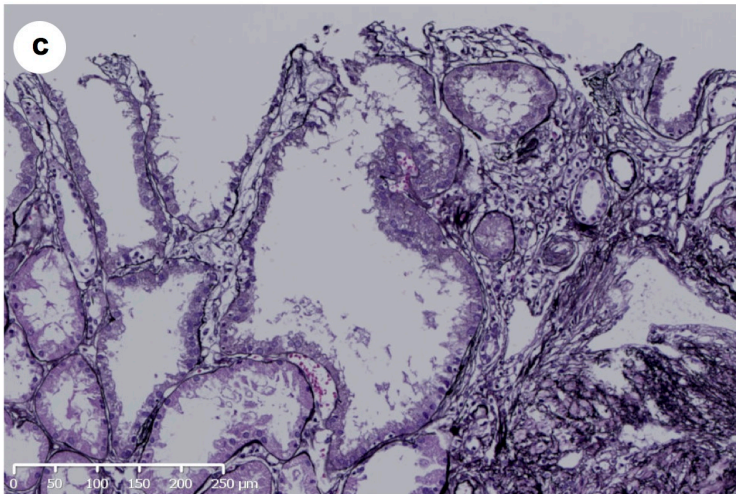

Supplement: mmc1.pdf [file mmc1.pdf]
